# Supplementary material for: A colorimetric aptasensor based on a hemin/EpCAM aptamer DNAzyme for sensitive exosome detection
Source: Royal Society of Chemistry journal article supplement (doi:10.1039/d2an01410f), 2022-01-01
Supplement: d2an01410f1.pdf [file d2an01410f1.pdf]

## Supplementary Information

### A colorimetric aptasensor based on hemin/EpCAM aptamer

#### DNAzyme for sensitive exosomes detection

Jingjing Kuang<sup>a</sup>, Zhibo Fu<sup>a</sup>, Xuezhi Sun<sup>a</sup>, Chuhui Lin<sup>a</sup>, Shenglong Yang<sup>a</sup>, Jiayao Xu<sup>a</sup>,  
Min Zhang<sup>b</sup>, Hongyang Zhang<sup>a</sup>, Fanghong Ning<sup>c,\*</sup>, Ping Hu<sup>a,\*</sup>

<sup>a</sup> Shanghai Key Laboratory of Functional Materials Chemistry, School of Chemistry & Molecular Engineering, East China University of Science and Technology, Shanghai 200237, China

<sup>b</sup> Engineering Research Centre of Pharmaceutical Process Chemistry, Ministry of Education, School of Pharmacy, East China University of Science and Technology, Shanghai 200237, China

<sup>c</sup> School of Biotechnology, East China University of Science and Technology, Shanghai 200237, China

**Table S1.** The sequences of ssDNA used in this work.

| Aptamer       | Sequences (5'-3')                                |
|---------------|--------------------------------------------------|
| CD63 aptamer  | CACCCACCTCGCTCCCGTGACACTAATGCTA                  |
| MUC1 aptamer  | TTGA TCCT TTGG ATA CC                            |
| EpCAM aptamer | CACTACAGAGGTTGCGTCTGTCCCACGTTGTCATGGGGGGTTGGCCTG |

**Table S2.** Comparison of the Michaelis-Menten Constant ( $K_m$ ) and Maximum Reaction Rate ( $V_{max}$ ) of the Reactions catalyzed by HRP and hemin/EpCAM aptamer DNAzyme.

| Catalyst            | Substrate                     | $K_m$ (mM) | $V_{max}$ (M/s)        |
|---------------------|-------------------------------|------------|------------------------|
| HRP                 | H <sub>2</sub> O <sub>2</sub> | 4.48       | $4.920 \times 10^{-8}$ |
| HRP                 | TMB                           | 0.72       | $6.224 \times 10^{-8}$ |
| hemin/EpCAM aptamer | H <sub>2</sub> O <sub>2</sub> | 6.31       | $19.21 \times 10^{-8}$ |
| hemin/EpCAM aptamer | TMB                           | 0.12       | $7.56 \times 10^{-8}$  |

\* Corresponding authors.

E-mail addresses: fhning@ecust.edu.cn (F. Ning), huping@ecust.edu.cn (P. Hu)

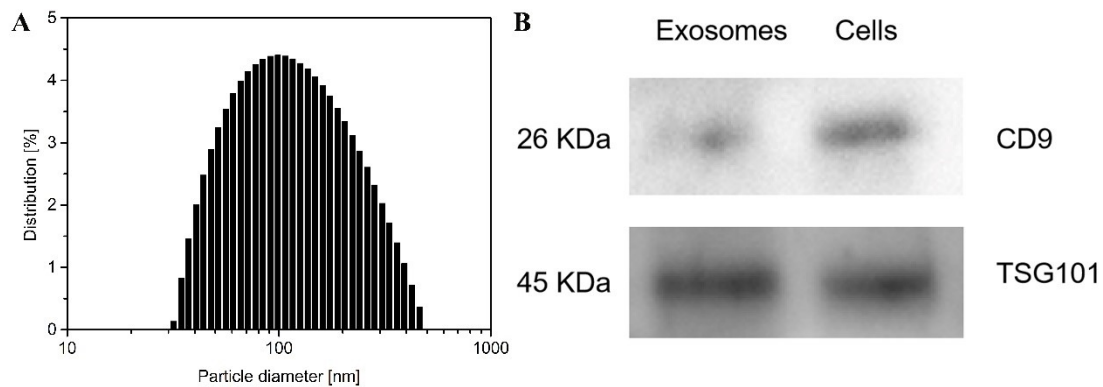

**Fig. S1** (A) DLS image of exosomes. (B) Western blot analysis of CD9 and TSG101 in MCF-7 cells and exosomes.

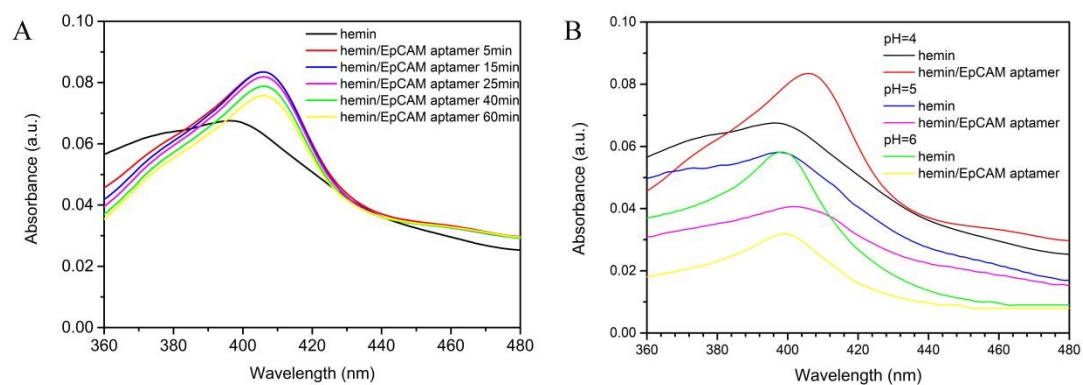

**Fig. S2** (A) The time-dependent UV spectra of hemin/EpCAM aptamer. (B) The UV-vis spectra of hemin/EpCAM aptamer at pH 4-6.

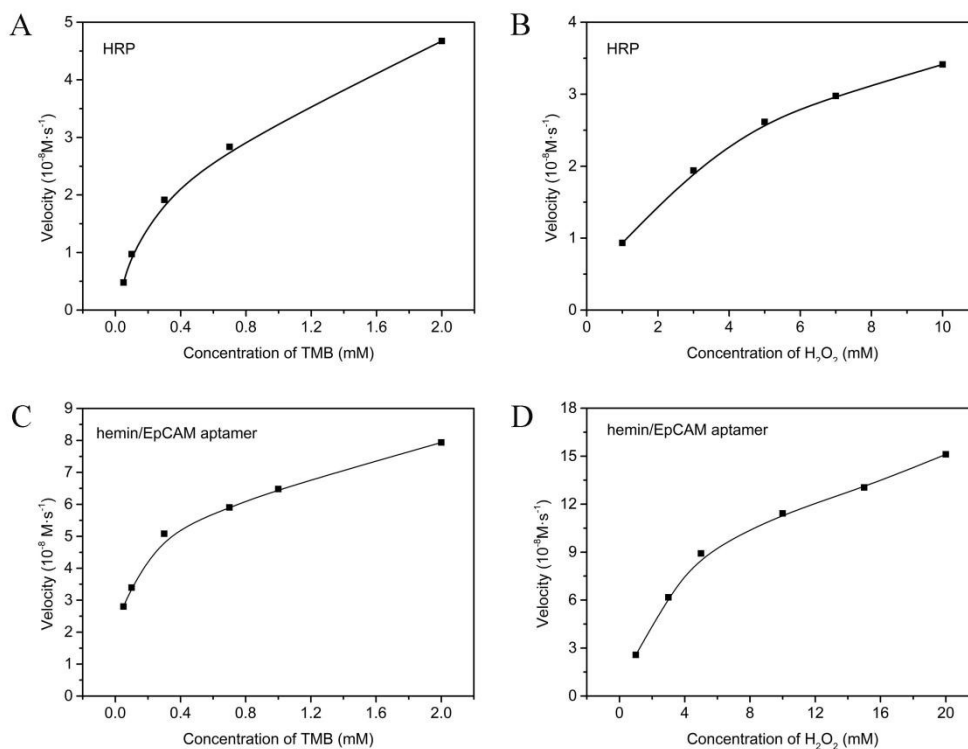

**Fig. S3** Steady-state kinetic assay of HRP and hemin/EpCAM aptamer DNzyme. (A)

Reaction velocity catalyzed by HRP with a fixed  $\text{H}_2\text{O}_2$  concentration (5 mM) and various TMB concentrations. (B) Reaction velocity catalyzed by HRP with a fixed TMB concentration (2 mM) and various  $\text{H}_2\text{O}_2$  concentrations. (C) Reaction velocity catalyzed by hemin/EpCAM aptamer with a fixed  $\text{H}_2\text{O}_2$  concentration (5 mM) and various TMB concentrations. (D) Reaction velocity catalyzed by hemin/EpCAM aptamer with a fixed TMB concentration (2 mM) and various  $\text{H}_2\text{O}_2$  concentrations.

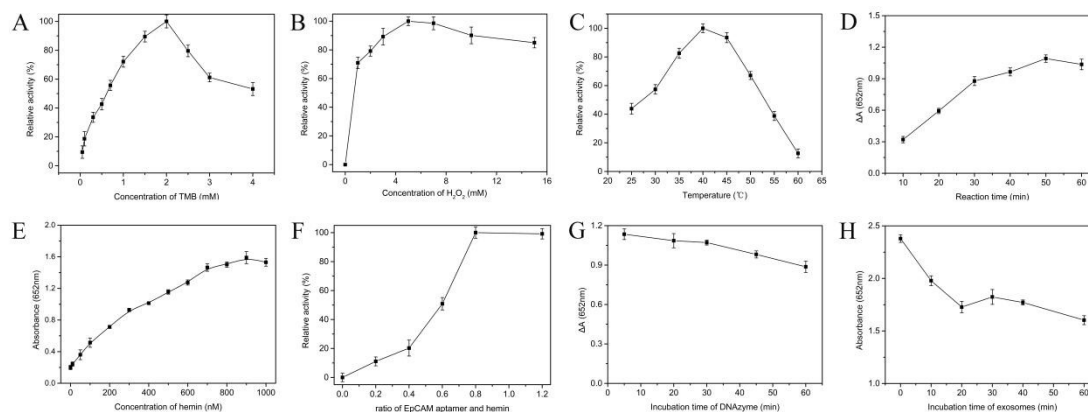

**Fig. S4** Experimental parameter optimization of (A) Concentration of TMB; (B) Concentration of  $\text{H}_2\text{O}_2$ ; (C) Reaction temperature; (D) Reaction time; (E) Concentration of hemin; (F) The ratio of EpCAM aptamer to hemin; (G) Incubation time of hemin/EpCAM aptamer; (H) Incubation time of exosomes. Error bars indicated standard deviations across three independent replicates.  $A_0$  and  $A$  were the absorbance recorded in the absence and presence of exosomes at 652 nm.  $\Delta A = A_0 - A$ .
